# Supplementary material
Source: publisher site journal article supplement (https://www.dovepress.com/article/509814)
Supplement: Supplementary file 1 [file get_supplementary_file.php]

**SUPPLEMENTARY MATERIALS**

**Supplementary Figures**

**Supplementary Figure S1. Assessing the Incidence of MASLD Across Diverse Trajectories of SII**

**Supplementary Figure S2: The Association Between Baseline SII and MASLD Risk by Sex.**

**Supplementary Tables**

**Supplementary Table S1. Average probabilities of group assignment and BIC statistics of model fits**

**Supplementary Table S2. Baseline characteristics of participants included in the study compared to those who excluded for MASLD at baseline**

**Supplementary Table S3. Ulticollinearity Test using Variance Inflation Factor.**

**Supplementary Table S4. Comparison between groups for different sensitivity analysis**

**Supplementary Table S5. Associations between SII and MASLD risk in individuals with specific lifestyle data (n=4,255)**

**Supplementary Table S6. The baseline characteristics of individuals with specific lifestyle data grouped by quartile for SII.**

**Supplementary Figure S1. Assessing the Incidence of MASLD Across Diverse Trajectories of SII**

**
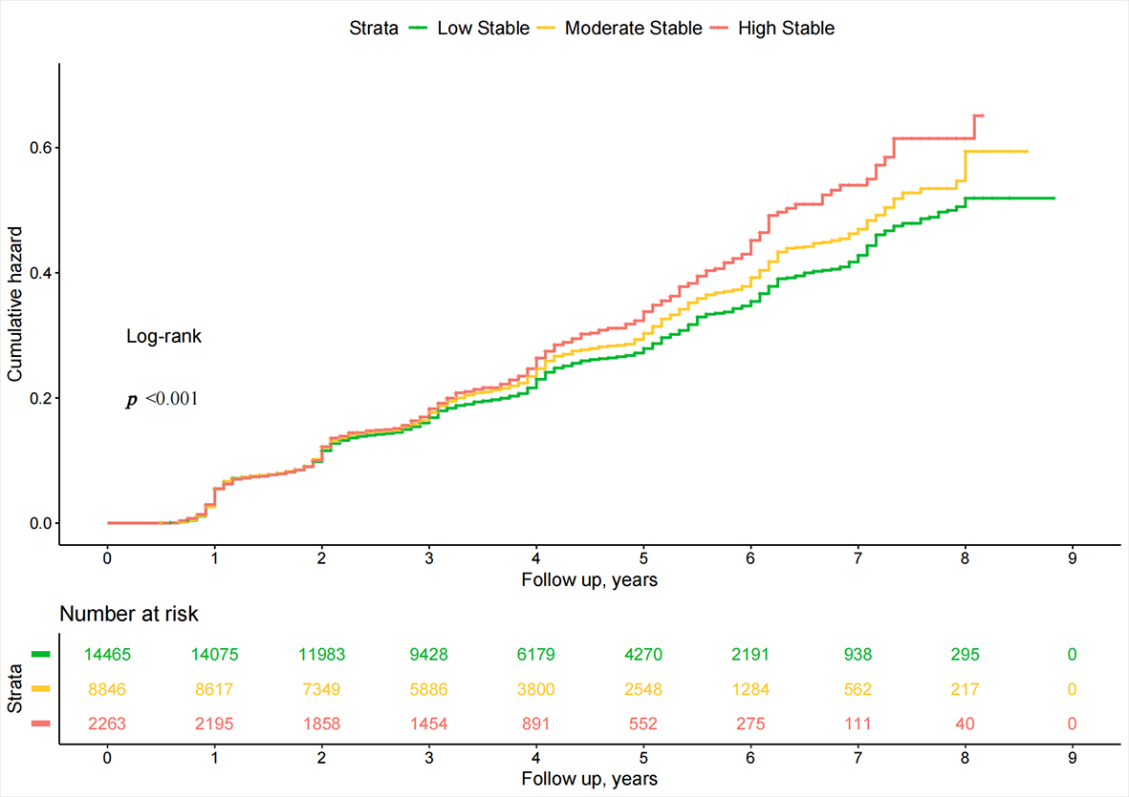
**

**Supplementary Figure S2: The Association Between Baseline SII and MASLD Risk by Sex.**


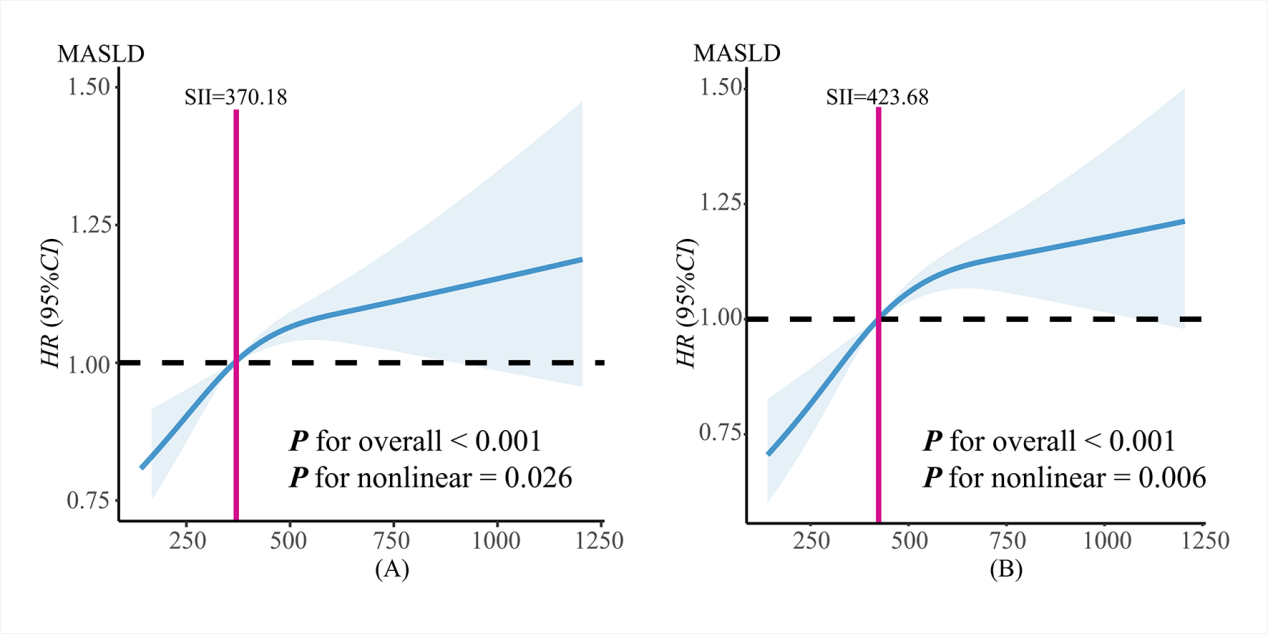


A: the association between baseline sii and masld risk in male (n=10,629);

B: the association between baseline sii and masld risk in female (n=14,971);

Restricted cubic spline analyses were conducted with 3 knots to assess the nonlinear relationship between baseline SII and MASLD on a continuous scale. The HRs were depicted by solid lines, while the 95% *CIs* were indicated by shaded areas. The analysis was adjusted for several factors, including age, BMI, Hb, ALT, AST, ALB, GLB, GGT, TBil, BUN, SCr, SUA, T2DM, hypertension, dyslipidemia, and smoking.

**Supplementary Table S1. Average probabilities of group assignment and BIC statistics of model fits**

| **Group types** | **Group1** | **Group2** | **Group3** | **Group4** | **Group5** | **BIC for total number of observations (N = 124,068)** | **BIC for total participants (N = 25,674)** | **AIC** | **Entropy** | **% Participants per** **trajectory group** |
| --- | --- | --- | --- | --- | --- | --- | --- | --- | --- | --- |
|
| 2 groups | 0.98 | 0.94 |  |  |  | -811854.87 | -811849.36 | -811820.82 | 0.89 | 76.45/23.55 |
| **3 groups** | **0.94** | **0.90** | **0.94** |  |  | **-804200.33** | **-804190.09** | **-804137.09** | **0.84** | **56.57/34.49/8.84** |
| 4 groups | 0.90 | 0.85 | 0.89 | 0.94 |  | -801406.12 | -801391.15 | -801313.70 | 0.81 | 42.25/39.18/14.92/3.65 |
| 5 groups | 0.91 | 0.86 | 0.86 | 0.88 | 0.95 | -799309.43 | -799290.53 | -799192.69 | 0.83 | 41.28/39.03/3.55/12.66/3.48 |

**Notes:** Bold font indicates the best model finally selected. The optimal model was selected based on the minimum absolute value of the BIC, ensuring that each trajectory had at least 5% representation and higher average posterior probabilities (0.70).

Abbreviations: BIC, bayesian information criterion; AIC, akaike information criterion

**Supplementary Table S2. Ulticollinearity Test using Variance Inflation Factor.**

| Variable | **Collinearity Statistics** | |
| --- | --- | --- |
| **VIF** | **1/VIF** |
| Age | 1.59 | 0.63 |
| Sex | 3.96 | 0.25 |
| BMI | 1.30 | 0.77 |
| Hb | 2.60 | 0.38 |
| ALT | 3.21 | 0.31 |
| AST | 2.72 | 0.36 |
| ALB | 1.42 | 0.70 |
| GLB | 1.19 | 0.84 |
| GGT | 1.61 | 0.62 |
| TBil | 1.19 | 0.84 |
| BUN | 1.33 | 0.75 |
| SUA | 2.04 | 0.49 |
| SCr | 2.87 | 0.35 |
| T2DM | 1.21 | 0.82 |
| Hypertension | 1.18 | 0.85 |
| Smoking | 1.03 | 0.97 |
| Dyslipidemia | 1.32 | 0.76 |

**Abbreviations:** BMI, body mass index; Hb, hemoglobin; ALT, alanine aminotransferase; AST, aspartate aminotransferase; ALB, albumin; GLB, globulin; GGT, gamma-glutamyl transferase; TBil, total bilirubin; DBil, direct bilirubin; SUA, serum uric acid; SCr, serum creatinine; T2DM, type 2 diabetes mellitus

**Supplementary Table S3 Baseline characteristics of participants included in the study compared to those who excluded for MASLD at baseline**

| **Variable** | **Included**  (N=26,191 ) | **Excluded for MASLD**  (N=11,072) | ***P*-value** |
| --- | --- | --- | --- |
| **Age (**Years)a | 38.00 (30.00,48.00) | 45.00 (35.00,53.00) | <0.001b |
| **Sex [n(%)]** |  |  | <0.001c |
| male | 10,626 (41.5%) | 8,275 (76.5%) |  |
| female | 14,971 (58.5%) | 2,543 (23.5%) |  |
| **SBP** (mmHg)a | 122.00 (113.00,133.00) | 132.00 (123.00,143.00) | <0.001b |
| **DBP** (mmHg)a | 73.98 (67.00,81.00) | 81.00 (74.00,88.00) | <0.001b |
| **BMI** (kg/m²)a | 22.66 (20.69,24.75) | 26.85 (24.93,29.00) | <0.001b |
| **WBC** (10⁹/L)a | 5.76 (4.92,6.74) | 6.54 (5.61,7.61) | <0.001b |
| **N** (10⁹/L)a | 3.31 (2.68,4.06) | 3.74 (3.07,4.53) | <0.001b |
| **L** (10⁹/L)a | 1.94 (1.62,2.30) | 2.21 (1.85,2.62) | <0.001b |
| **M** (10⁹/L)a | 0.30 (0.24,0.38) | 0.34 (0.28,0.43) | <0.001b |
| **RBC** (10⁹/L)a | 4.70 (4.42,5.04) | 5.07 (4.77,5.34) | <0.001b |
| **Hb** (g/L)a | 140.00 (131.00,153.00) | 155.00 (144.00,162.00) | <0.001b |
| **PLT** (10⁹/L)a | 236.00 (203.00,272.00) | 234.00 (202.00,271.00) | 0.138b |
| **ALT (**U/L)a | 16.14 (12.18,22.35) | 30.00 (21.33,44.67) | <0.001b |
| **AST (**U/L)a | 18.68 (16.14,21.98) | 23.00 (19.09,28.28) | <0.001b |
| **TP** (g/L)a | 74.57 (72.56,76.58) | 75.36 (73.31,77.60) | <0.001b |
| **ALB** (g/L)a | 46.75 (45.22,48.34) | 47.40 (45.84,48.91) | <0.001b |
| **GLB** (g/L)a | 27.76 (25.90,29.58) | 28.00 (26.06,29.98) | <0.001b |
| **GGT (**kg/m²)a | 14.14 (10.64,21.33) | 29.72 (20.66,46.00) | <0.001b |
| **TBil (**U/L)a | 13.68 (11.07,16.91) | 14.13 (11.36,17.15) | <0.001b |
| **DBil (**U/L)a | 4.38 (3.51,5.50) | 4.36 (3.49,5.41) | 0.001b |
| **SUA (**μmol/L)a | 310.00 (258.42,373.28) | 401.45 (341.77,460.10) | <0.001b |
| **SCr (**μmol/L)a | 62.00 (53.67,74.98) | 72.00 (62.00,80.00) | <0.001b |
| **FPG (**mmol/L)a | 5.32 (5.06,5.62) | 5.68 (5.34,6.24) | <0.001b |
| **TC (**mmol/L)a | 4.70 (4.19,5.29) | 5.09 (4.53,5.70) | <0.001b |
| **TG (**mmol/L)a | 1.18 (0.87,1.60) | 1.95 (1.44,2.66) | <0.001b |
| **HDL-C (**mmol/L)a | 1.38 (1.19,1.60) | 1.11 (0.98,1.27) | <0.001b |
| **LDL-C (**mmol/L)a | 2.45 (2.05,2.89) | 2.79 (2.36,3.23) | <0.001b |
| **Smoking [n(%)]** | 779(3.8) | 598(7.0) | <0.001c |
| **T2DM [n(%)]** | 2,162 (8.4%) | 1,900 (17.6%) | <0.001c |
| **Hypertension [n(%)]** | 4,470 (17.5%) | 4,179 (38.6%) | <0.001c |
| **Dyslipidemia [n(%)]** | 6,689 (26.1%) | 6,615 (61.1%) | <0.001c |

NOTES: aMedian (Q1, Q3); n (%). bKruskal-Wallis rank sum test. cPearson's Chi-squared test.

**Abbreviations:** SBP, systolic blood pressure; DBP, diastolic blood pressure; BMI, body mass index; WBC, white blood cell; N, neutrophil; L, lymphocyte; M, monocyte; RBC, red blood cell; Hb, hemoglobin; PLT, platelet; ALT, alanine aminotransferase; AST, aspartate aminotransferase; TP, total protein; ALB, albumin; GLB, globulin; GGT, gamma-glutamyl transferase; TBil, total bilirubin; DBil, direct bilirubin; BUN, blood urea nitrogen; SUA, serum uric acid; SCr, serum creatinine; FPG, fasting plasma glucose; TC, total cholesterol; TG, triglycerides; HDL-C, high-density lipoprotein; LDL-C, low-density lipoprotein; T2DM, type 2 diabetes mellitus

**Supplementary Table S4 The baseline characteristics of individuals with specific lifestyle data grouped by quartile for SII.**

| **Variable** | **Q1 (N=1,064)** | **Q2 (N=1,064)** | **Q3 (N=1,064)** | **Q4 (N=1,064)** | ***P*-value** | **q-value**b |
| --- | --- | --- | --- | --- | --- | --- |
| **Age (**Years)a | 32 (27, 42) | 32 (27, 40) | 33 (27, 41) | 33 (27, 41) | 0.610c | 0.700 |
| **Sex [n(%)]** |  |  |  |  | <0.001d | <0.001 |
| male | 406 (38%) | 327 (31%) | 262 (25%) | 214 (20%) |  |  |
| female | 658 (62%) | 737 (69%) | 802 (75%) | 849 (80%) |  |  |
| **SBP** (mmHg)a | 120 (111, 130) | 120 (110, 130) | 120 (111, 128) | 120 (110, 128) | 0.300c | 0.440 |
| **DBP** (mmHg)a | 73 (66, 80) | 72 (65, 80) | 73 (66, 79) | 73 (66, 79) | 0.580c | 0.700 |
| **BMI** (kg/m²)a | 21.60 (19.55, 23.84) | 22.02 (19.83, 23.84) | 21.95 (20.06, 24.16) | 22.03 (19.96, 24.01) | 0.044c | 0.089 |
| **WBC** (10⁹/L)a | 5.13 (4.43, 5.85) | 5.59 (4.85, 6.44) | 5.90 (5.16, 6.83) | 6.65 (5.76, 7.57) | <0.001c | <0.001 |
| **N** (10⁹/L)a | 2.53 (2.13, 2.97) | 3.05 (2.64, 3.54) | 3.53 (3.03, 4.10) | 4.33 (3.73, 5.08) | <0.001c | <0.001 |
| **L** (10⁹/L)a | 2.15 (1.82, 2.54) | 2.05 (1.74, 2.42) | 1.91 (1.63, 2.25) | 1.75 (1.46, 2.06) | <0.001c | <0.001 |
| **M** (10⁹/L)a | 0.28 (0.22, 0.36) | 0.30 (0.24, 0.38) | 0.31 (0.25, 0.39) | 0.34 (0.27, 0.42) | <0.001c | <0.001 |
| **RBC** (10⁹/L)a | 4.65 (4.37, 4.98) | 4.62 (4.38, 4.96) | 4.63 (4.38, 4.93) | 4.59 (4.36, 4.87) | 0.020c | 0.045 |
| **Hb** (g/L)a | 139.00 (131.00, 152.00) | 138.00 (130.00, 149.50) | 137.00 (129.00, 147.00) | 135.00 (128.00, 145.00) | <0.001c | <0.001 |
| **PLT** (10⁹/L)a | 205.00 (179.00, 230.00) | 235.00 (209.00, 262.50) | 252.00 (223.00, 283.00) | 273.00 (241.00, 310.00) | <0.001c | <0.001 |
| **ALT (**U/L)a | 15.61 (11.71, 22.00) | 15.00 (11.20, 21.31) | 14.40 (11.00, 20.00) | 14.06 (11.00, 20.00) | <0.001c | <0.001 |
| **AST (**U/L)a | 18.57 (16.13, 22.00) | 18.00 (15.82, 21.24) | 17.80 (15.51, 20.93) | 17.34 (15.15, 20.47) | <0.001c | <0.001 |
| **TP** (g/L)a | 74.00 (71.54, 76.72) | 74.15 (71.90, 76.71) | 74.62 (71.55, 77.20) | 74.41 (72.00, 77.00) | 0.086c | 0.170 |
| **ALB** (g/L)a | 46.91 (45.20, 48.58) | 46.71 (44.96, 48.40) | 46.64 (45.02, 48.48) | 46.51 (44.62, 48.21) | 0.002c | 0.005 |
| **GLB** (g/L)a | 27.00 (25.01, 29.36) | 27.43 (25.54, 29.50) | 27.68 (25.39, 29.90) | 27.95 (25.80, 30.10) | <0.001c | <0.001 |
| **GGT (**kg/m²)a | 12.39 (9.74, 18.00) | 12.11 (9.60, 17.91) | 12.56 (9.89, 17.70) | 12.50 (9.75, 17.31) | 0.980c | 0.990 |
| **TBil (**U/L)a | 13.48 (10.82, 17.31) | 12.99 (10.44, 16.52) | 12.77 (10.19, 16.14) | 12.17 (9.50, 15.60) | <0.001c | <0.001 |
| **DBil (**U/L)a | 4.44 (3.47, 5.65) | 4.22 (3.35, 5.55) | 4.18 (3.27, 5.42) | 3.88 (3.01, 5.25) | <0.001c | <0.001 |
| **SUA (**μmol/L)a | 299.56 (251.77, 363.34) | 297.90 (250.19, 357.20) | 290.75 (246.00, 345.00) | 288.73 (246.18, 341.95) | 0.004c | 0.009 |
| **SCr (**μmol/L)a | 61.00 (53.54, 73.58) | 59.00 (52.00, 70.46) | 57.31 (50.90, 66.94) | 56.26 (50.39, 64.55) | <0.001c | <0.001 |
| **FPG (**mmol/L)a | 5.26 (5.00, 5.54) | 5.25 (4.99, 5.53) | 5.23 (4.98, 5.52) | 5.28 (5.00, 5.57) | 0.350c | 0.500 |
| **TC (**mmol/L)a | 4.63 (4.06, 5.16) | 4.63 (4.11, 5.17) | 4.66 (4.12, 5.24) | 4.57 (4.07, 5.06) | 0.110c | 0.200 |
| **TG (**mmol/L)a | 0.95 (0.71, 1.30) | 1.00 (0.73, 1.37) | 1.01 (0.74, 1.36) | 1.03 (0.79, 1.43) | <0.001c | <0.001 |
| **HDL-C (**mmol/L)a | 1.45 (1.24, 1.66) | 1.41 (1.24, 1.65) | 1.44 (1.23, 1.65) | 1.41 (1.21, 1.65) | 0.460c | 0.630 |
| **LDL-C (**mmol/L)a | 2.39 (1.93, 2.85) | 2.42 (1.98, 2.88) | 2.41 (2.01, 2.86) | 2.38 (1.95, 2.82) | 0.140c | 0.230 |
| **Dyslipidemia [n(%)]** | 127 (12%) | 151 (14%) | 163 (15%) | 158 (15%) | 0.1104 | 0.200 |
| **T2DM [n(%)]** | 35 (3.3%) | 30 (2.8%) | 28 (2.6%) | 27 (2.5%) | 0.730d | 0.780 |
| **Hypertension [n(%)]** | 138 (13%) | 136 (13%) | 134 (13%) | 136 (13%) | 0.990d | 0.990 |
| **Smoking[n(%)]** | 175 (16%) | 135 (13%) | 115 (11%) | 103 (9.7%) | <0.001d | <0.001 |
| **Vegetable intake [n(%)]** |  |  |  |  | 0.620d | 0.700 |
| insufficient | 766 (72%) | 775 (73%) | 790 (74%) | 766 (72%) |  |  |
| sufficient | 298 (28%) | 289 (27%) | 274 (26%) | 297 (28%) |  |  |
| **Fruit intake[n(%)]** |  |  |  |  | 0.550d | 0.690 |
| insufficient | 779 (73%) | 789 (74%) | 807 (76%) | 796 (75%) |  |  |
| sufficient | 285 (27%) | 275 (26%) | 257 (24%) | 267 (25%) |  |  |
| **Milk intake[n(%)]** |  |  |  |  | 0.095d | 0.180 |
| insufficient | 719 (68%) | 713 (67%) | 759 (71%) | 746 (70%) |  |  |
| yes | 345 (32%) | 351 (33%) | 305 (29%) | 317 (30%) |  |  |
| **Sleep duration[n(%)]** |  |  |  |  | 0.570d | 0.690 |
| insufficient | 215 (20%) | 211 (20%) | 235 (22%) | 226 (21%) |  |  |
| sufficient | 849 (80%) | 853 (80%) | 829 (78%) | 837 (79%) |  |  |
| **Sugary beverages[n(%)]** |  |  |  |  | 0.280d | 0.420 |
| no | 564 (57%) | 535 (54%) | 534 (53%) | 563 (57%) |  |  |
| yes | 432 (43%) | 456 (46%) | 469 (47%) | 430 (43%) |  |  |
| **Physical activity[n(%)]** |  |  |  |  | 0.130d | 0.220 |
| insufficient | 129 (12%) | 142 (13%) | 134 (13%) | 166 (16%) |  |  |
| moderate | 641 (60%) | 650 (61%) | 625 (59%) | 601 (57%) |  |  |
| sufficient | 294 (28%) | 272 (26%) | 305 (29%) | 296 (28%) |  |  |

**Notes:** aMedian (Q1, Q3); n (%). bFalse discovery rate correction for multiple testing. cKruskal-Wallis rank sum test. dPearson's Chi-squared test. "Q1, Q2, Q3, Q4" represent the stratification by quartile for baseline SII.

**Abbreviations:** SBP, systolic blood pressure; DBP, diastolic blood pressure; BMI, body mass index; WBC, white blood cell; N, neutrophil; L, lymphocyte; M, monocyte; RBC, red blood cell; Hb, hemoglobin; PLT, platelet; ALT, alanine aminotransferase; AST, aspartate aminotransferase; TP, total protein; ALB, albumin; GLB, globulin; GGT, gamma-glutamyl transferase; TBil, total bilirubin; DBil, direct bilirubin; BUN, blood urea nitrogen; SUA, serum uric acid; SCr, serum creatinine; FPG, fasting plasma glucose; TC, total cholesterol; TG, triglycerides; HDL-C, high-density lipoprotein; LDL-C, low-density lipoprotein; T2DM, type 2 diabetes mellitus.

**Supplementary Table S5. Comparison between groups for different sensitivity analysis**

| Sensitivity analysis | Model 1 | | Model 2 | | Model 3 | |
| --- | --- | --- | --- | --- | --- | --- |
| *HR* (95% *CI*) | ***P*** | *HR* (95% *CI*) | ***P*** | *HR* (95% *CI*) | ***P*** |
| **A** |  |  |  |  |  |  |
| Low stable | 1 (Reference) |  | 1 (Reference) |  | 1 (Reference) |  |
| Moderate Stable | 1.110 (1.039,1.186) | 0.002 | 1.267 (1.185,1.354) | <0.001 | 1.194 (1.115,1.278) | 0.001 |
| High stable | 1.176 (1.040,1.328) | 0.009 | 1.375 (1.317,1.555) | <0.001 | 1.351 (1.192,1.530) | <0.001 |
| **B** |  |  |  |  |  |  |
| Low stable | 1 (Reference) |  | 1 (Reference) |  | 1 (Reference) |  |
| Moderate Stable | 1.106 (1.029,1.188) | 0.006 | 1.227 (1.142,1.319) | <0.001 | 1.126 (1.047,1.211) | 0.001 |
| High stable | 1.273 (1.134,1.430) | <0.001 | 1.493 (1.328,1.678) | <0.001 | 1.382 (1.228,1.555) | <0.001 |
| **C** |  |  |  |  |  |  |
| Low stable | 1 (Reference) |  | 1 (Reference) |  | 1 (Reference) |  |
| Moderate Stable | 1.106 (1.029,1.188) | 0.006 | 1.227 (1.142,1.319) | <0.001 | 1.126 (1.047,1.211) | 0.001 |
| High stable | 1.273 (1.134,1.430) | <0.001 | 1.493 (1.328,1.678) | <0.001 | 1.382 (1.228,1.555) | <0.001 |

A: Removing individuals with missing values for key covariates (n=8,078)

B: Excluding individuals who experienced diseases within two years (n=4,384)

C: Excluding individuals using medications (n=1,225)

Model 1: Unadjusted;

Model 2: Adjusted for baseline age and sex;

Model 3: Adjusted for baseline age, sex, BMI, Hb, ALT, AST, ALB, GLB, GGT, TBiL, BUN, SCr, SUA, T2DM, hypertension, dyslipidemia, and smoking.

Abbreviations: HR hazard ratio, CI confidence interval. Other abbreviations are as defined in Table 1.

**Supplementary Table S6. Associations between SII and MASLD risk in individuals with specific lifestyle data (n=4,255)**

| Baseline SII quartile groups | Model 1 | | Model 2 | | Model 3 | |
| --- | --- | --- | --- | --- | --- | --- |
| *HR* (95% *CI*) | ***P*** | *HR* (95% *CI*) | ***P*** | *HR* (95% *CI*) | ***P*** |
| Q1 | 1 (Reference) |  | 1 (Reference) |  | 1 (Reference) |  |
| Q2 | 1.267 (1.028,1.562) | 0.027 | 1.195 (0.945,1.510) | 0.137 | 1.211 (0.957,1.532) | 0.111 |
| Q3 | 1.279 (1.036,1.578) | 0.022 | 1.298 (1.029,1.637) | 0.028 | 1.333 (1.056,1.682) | 0.016 |
| Q4 | 1.439 (1.164,1.779) | 0.001 | 1.357 (1.073,1.715) | 0.011 | 1.382 (1.096,1.753) | 0.006 |

Model 1:Adjusted for baseline age and sex;

Model 2:Adjusted for baseline age, sex, BMI, Hb, ALT, AST, ALB, GLB, GGT, TBiL, BUN, SCr, SUA, T2DM, hypertension, dyslipidemia, and smoking..

Model 3: Adjusted for baseline age, sex, BMI, Hb, ALT, AST, ALB, GLB, GGT, TBiL, BUN, SCr, SUA, T2DM, hypertension, dyslipidemia, smoking, sleep duration, physical activity, vegetable consumption, fruit consumption, milk intake, and sugary beverages.

"Q1, Q2, Q3, Q4" represent the stratification by quartile for baseline SII.

Abbreviations: HR, hazard ratio; CI, confidence interval. Other abbreviations are as defined in Table 1.
